# Supplementary material for: Inhibitory Effect and Potential Antagonistic Mechanism of Isolated Epiphytic Yeasts against Botrytis cinerea and Alternaria alternata in Postharvest Blueberry Fruits
Source: MDPI journal article supplement (doi:10.3390/foods13091334), 2024-04-26
Supplement: s1 [file s1]

## Supplementary Material

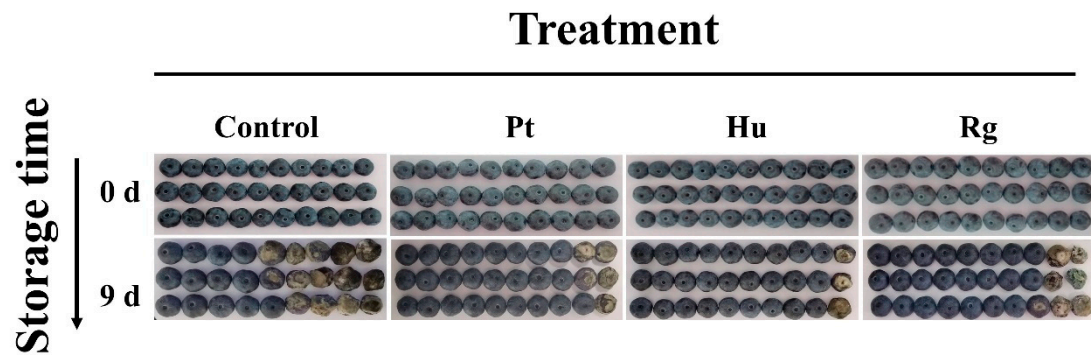

**Figure S1.** Pictures of representative blueberry samples were recorded during the storage period (0 and 9 days) at room temperature. Pt, Hu, and Rg in the figure denote *P. terrestris*, *H. uvarum*, and *R. glutinis*, respectively.
